# Supplementary material for: Synchronized switching of multiple toxin–antitoxin modules by (p)ppGpp fluctuation
Source: PubMed Central journal article supplement — Nucleic Acids Res. 2017 Jun 27;45(14):8180–9. doi: 10.1093/nar/gkx552 (PMC5737467; doi:10.1093/nar/gkx552), 2017-06-27
Supplement: gkx552_supp.pdf [file gkx552_supp.pdf]

## Supplementary Information

### References

1. Overgaard, M., Borch, J., and Gerdes, K. (2009) RelB and RelE of Escherichia coli Form a Tight Complex That Represses Transcription via the Ribbon–Helix–Helix Motif in RelB. *J Mol Biol*, **394**(2), 183–196.
2. Maisonneuve, E., Castro-Camargo, M., and Gerdes, K. (2013) (p) ppGpp controls bacterial persistence by stochastic induction of toxin-antitoxin activity. *Cell*, **154**(5), 1140–1150.
3. Li, G.-W., Burkhardt, D., Gross, C., and Weissman, J. S. (2014) Quantifying absolute protein synthesis rates reveals principles underlying allocation of cellular resources. *Cell*, **157**(3), 624–635.
4. Cataudella, I., Sneppen, K., Gerdes, K., and Mitarai, N. (2013) Conditional cooperativity of toxin-antitoxin regulation can mediate bistability between growth and dormancy. *PLoS Comput Biol*, **9**(8), e1003174.

# 1 Supplementary Tables

**Table S1.** Parameter values in the model

| Parameter    | Meaning                                                                 | Value                   | Remark                                                                                                                                                                                                                                                                                                                                                                                       |
|--------------|-------------------------------------------------------------------------|-------------------------|----------------------------------------------------------------------------------------------------------------------------------------------------------------------------------------------------------------------------------------------------------------------------------------------------------------------------------------------------------------------------------------------|
| $K_o$        | Dissociation constant between $A_2T$ and promoter                       | $3 \mu m^{-3}$          | Assumed. This parameter is insensitive to persister properties (Fig. S7).                                                                                                                                                                                                                                                                                                                    |
| $\beta_T$    | Maximal reduction of toxin production by free toxins                    | 20                      | Assumed. This parameter is insensitive to persister properties (Fig. S7).                                                                                                                                                                                                                                                                                                                    |
| $\beta_A$    | Maximal reduction of antitoxin production by free toxins                | 10                      | Experimental measurements gave $\beta_A/\beta_T \approx 0.5$ (Table I).                                                                                                                                                                                                                                                                                                                      |
| $\beta_0$    | Maximal growth reduction by free toxins                                 | 200                     | Assumed. This parameter is insensitive to persister properties (Fig. S7).                                                                                                                                                                                                                                                                                                                    |
| $K_t$        | Association constant between $A_2$ and $T$ , and between $A_2T$ and $T$ | $3 \mu m^3$             | Ref. [1] measured that the dissociation constant is $0.33nM$ . Here we use that $1nM$ approximately corresponds to 1 molecule per $\mu m^3$ . This parameter is insensitive to persister properties (Fig. S7).                                                                                                                                                                               |
| $d_{A,low}$  | Degradation rate of antitoxins with low (p)ppGpp level                  | $2.9 * 10^{-4} s^{-1}$  | The half life of antitoxins in low (p)ppGpp level is approximately 40 min.                                                                                                                                                                                                                                                                                                                   |
| $d_{A,high}$ | Degradation rate of antitoxins with high (p)ppGpp level                 | $5.8 * 10^{-4} s^{-1}$  | The half life of antitoxins in high (p)ppGpp level is approximately 20 min (fitted to the RelB measurement in Ref. [2]).                                                                                                                                                                                                                                                                     |
| $d_T$        | Degradation rate of toxins                                              | $3.9 * 10^{-5} s^{-1}$  | Assume that the half life of toxins is 300 min.                                                                                                                                                                                                                                                                                                                                              |
| $D$          | Michaelis-Menten constant for toxins' activity                          | $200 \mu m^{-3}$        | Assumed. This parameter is insensitive to persister properties (Fig. S7).                                                                                                                                                                                                                                                                                                                    |
| $\Gamma_0$   | Dilution rate of cells                                                  | $7.8 * 10^{-4} s^{-1}$  | The doubling time of cells with low (p)ppGpp level is assumed to be 40 min. So we have $\Gamma_0/(1 + \beta_0 \sum_i [T_f^{(i)}]/(\sum_i [T_f^{(i)}] + D)) = \ln(2)/2400s^{-1}$ . Under high (p)ppGpp level, we assume that cells do not grow, corresponding to $\Gamma_0 = 0$ .                                                                                                             |
| $\sigma_A$   | Maximal production rate of antitoxin dimers                             | $12 \mu m^{-3} s^{-1}$  | Equation for antitoxins is in the steady states with low (p)ppGpp level.                                                                                                                                                                                                                                                                                                                     |
| $\sigma_T$   | Maximal production rate of toxins                                       | $2.1 \mu m^{-3} s^{-1}$ | Equation for toxins is in the steady states with low(p)ppGpp levels.                                                                                                                                                                                                                                                                                                                         |
| $[A]_0$      | Steady state level of antitoxins with low (p)ppGpp level                | $200 \mu m^{-3}$        | Assumed.                                                                                                                                                                                                                                                                                                                                                                                     |
| $[T]_0$      | Steady state level of toxins with low (p)ppGpp level                    | $59 \mu m^{-3}$         | We choose the ratio of production rates to be $A : T = 6 : 1$ based on ribosome profiling data [3]. The degradation rate of antitoxin is $1/(40min) + d_A$ and the rate of toxin is $1/(40min) + d_T$ . So the ratio of degradation rates is $A : T = (1/(40min) + d_A)/(1/(40min) + d_T) \approx 1.76$ . Therefore, the steady state level satisfies that $[A]_0 : [T]_0 \approx 3.4 : 1$ . |
| $r_+$        | Transition rate of (p)ppGpp from low level to high level                | $2.9 * 10^{-8} s^{-1}$  | Fitted                                                                                                                                                                                                                                                                                                                                                                                       |
| $r_-$        | Transition rate of (p)ppGpp from high level to low level                | $2.9 * 10^{-5} s^{-1}$  | Fitted                                                                                                                                                                                                                                                                                                                                                                                       |

## 2 Supplementary Figures

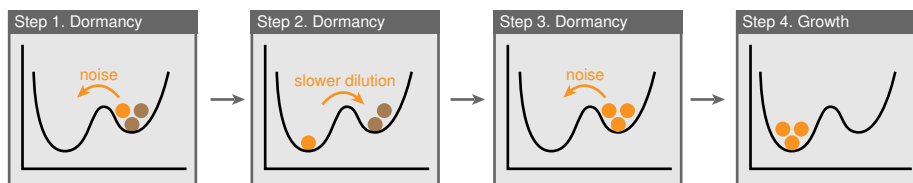

**Figure S1. Schematic description of stochastic transition from dormancy to growth following bistability-based mechanism.** If molecular noises induce one or few TA systems to a temporarily high-antitoxin-low-toxin level (step 1), cellular growth remains repressed as the other TA systems keep producing free toxin proteins. This slow growth rate may drive the switched TA systems back to dormancy state since toxins are long-lived and are sensitive to cell dilution while antitoxins are not [4] (step 2). Therefore, a successful transition requires a simultaneous switching of all TA systems to the growth state (step 3-4).

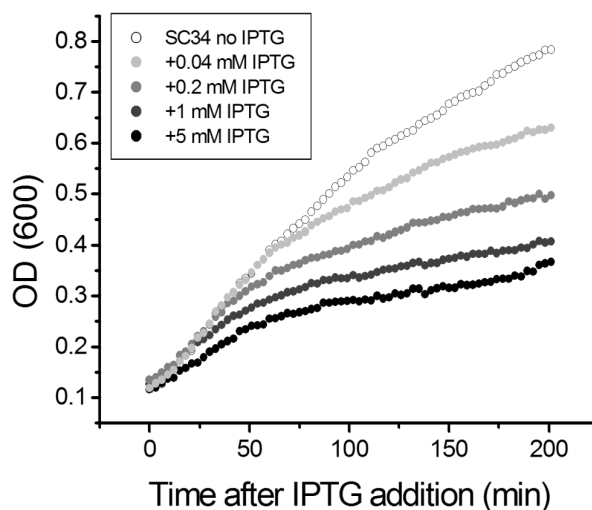

**Figure S2. The effect of RelE expression on the growth of SC34 cells.** SC34 cells containing the pSEM3187 plasmid were grown at 37°C in LB zeocin (70  $\mu\text{g}/\text{ml}$ ) medium to  $\text{OD}_{600} \sim 0.1$  in a FLUOstar Omega Microplate Reader (BMG Labtech) before IPTG was added to the cultures (0 time) at different concentrations.

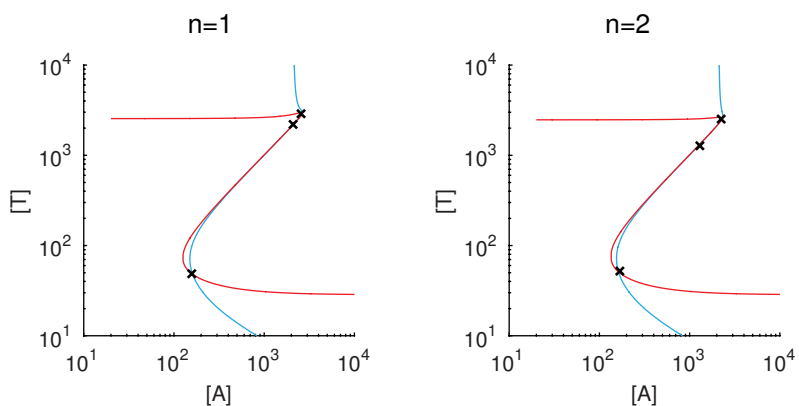

**Figure S3. Steady states and nullclines of the model for coupled TA systems without (p)ppGpp fluctuation (related to Fig. 3)** The steady states (black cross) and nullclines (blue for  $d[A]/dt = 0$  and red for  $d[T]/dt = 0$ ) are computed by assuming that all TA systems share the same concentrations.  $n$  represents the number of TA systems.

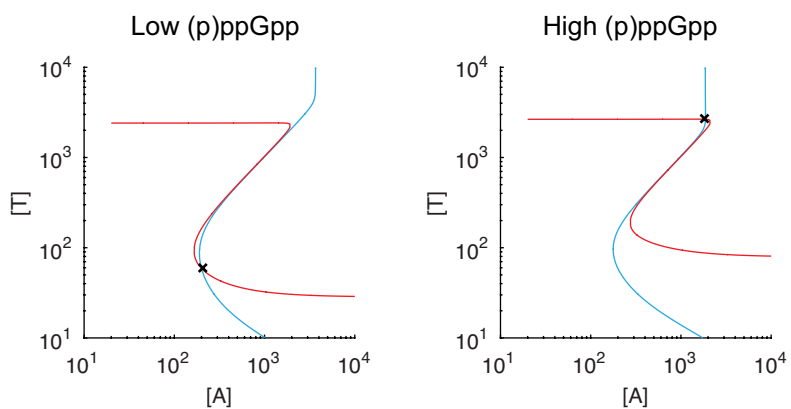

**Figure S4. Steady states and nullclines of the model for 10 coupled TA systems with (p)ppGpp fluctuation (related to Table S1).** The figures are produced as described in Fig. S3.

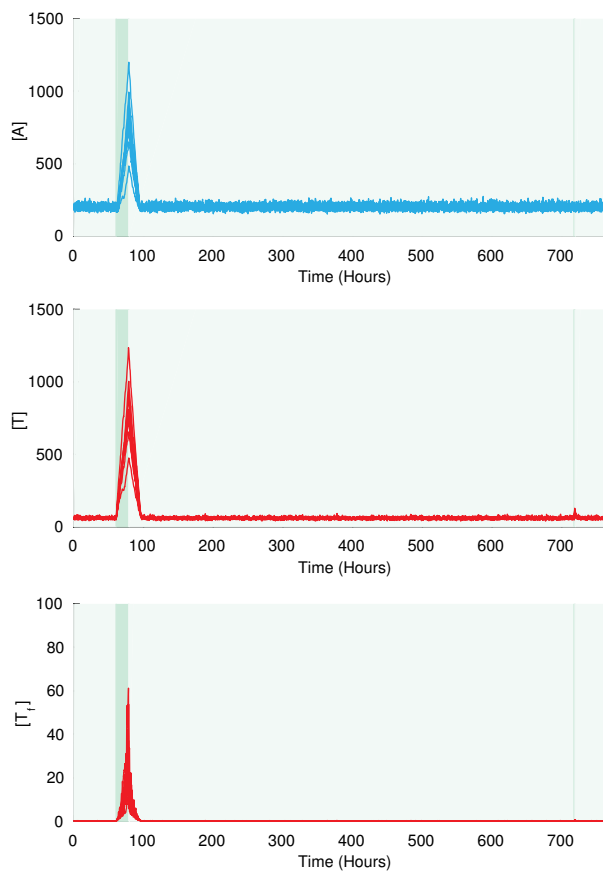

Figure S5. Sample simulation trajectory of the model with 10 coupled TA systems (related to Fig. 4a)

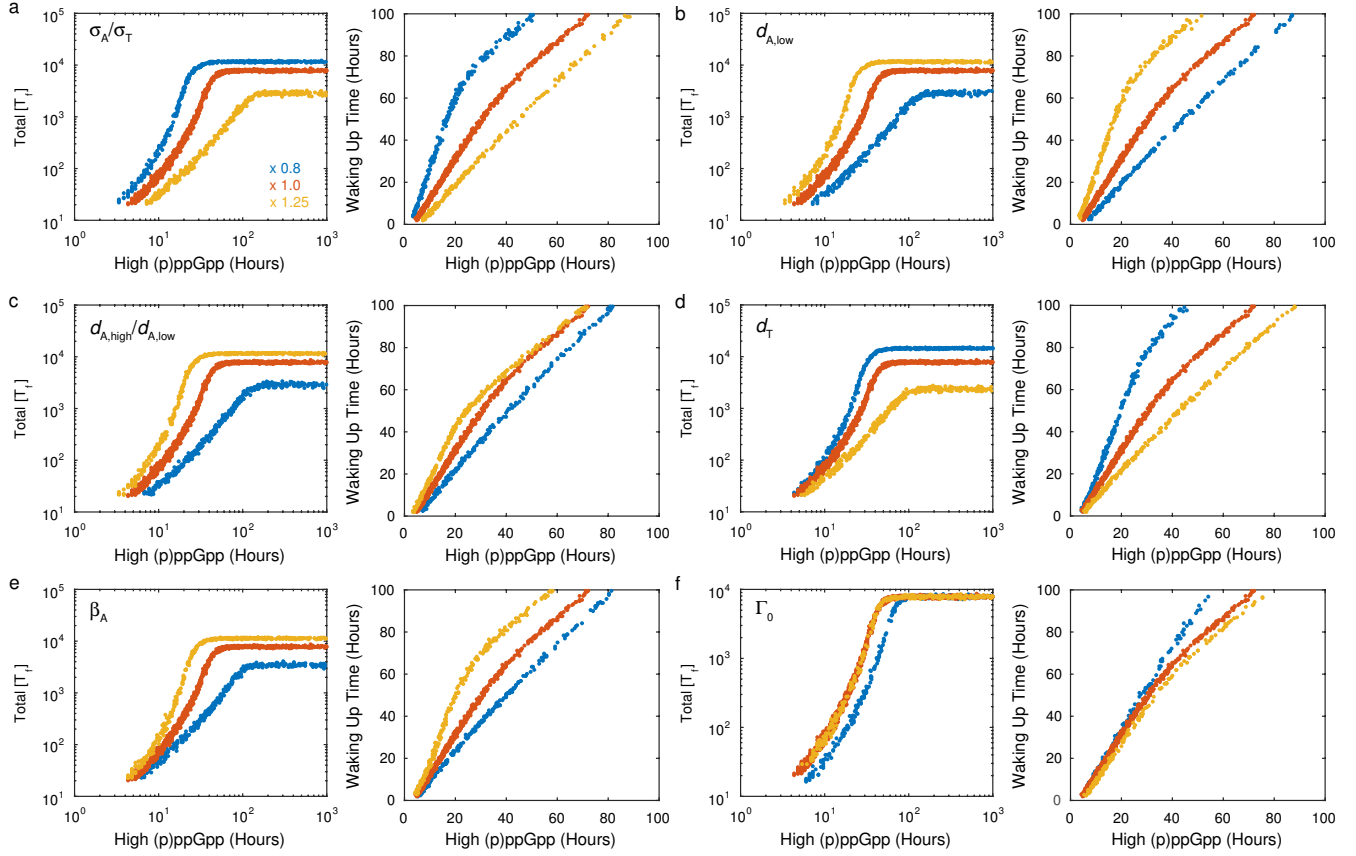

**Figure S6. Sensitive parameters of the model for coupled TA systems with (p)ppGpp fluctuation (related to Table S1)** We implement the model with parameter values listed in Table S1 and modulate the value of the parameter indicated in the figure. We simulate the model and produce the dependency of the amount of accumulated free toxins (left) and waking up times (right) on the duration of (p)ppGpp fluctuation following the same procedure for Fig. 5. Blue dots: parameter value reduces by 1.25 folds; red dots: parameter value is not changed; yellow dots: parameter value increases by 1.25 folds. (a) Change in the ratio of production rates ( $\sigma_A/\sigma_T$ ). We keep the value of  $\sigma_T$  and change the value of  $\sigma_A$  accordingly. (b) Change in the degradation rates of antitoxins under low (p)ppGpp levels ( $d_{A,low}$ ). We keep the value of  $d_{A,high}/d_{A,low}$  unchanged. (c) Change in the effect of (p)ppGpp on antitoxin degradation rates ( $d_{A,high}/d_{A,low}$ ). We keep the value of  $d_{A,low}$  and change  $d_{A,high}$  accordingly. (d) Change in the degradation rate of toxins ( $d_T$ ). (e) Change in the translation inhibition on antitoxins ( $\beta_A$ ). (f) Change in the value of dilution rate ( $\Gamma_0$ ).

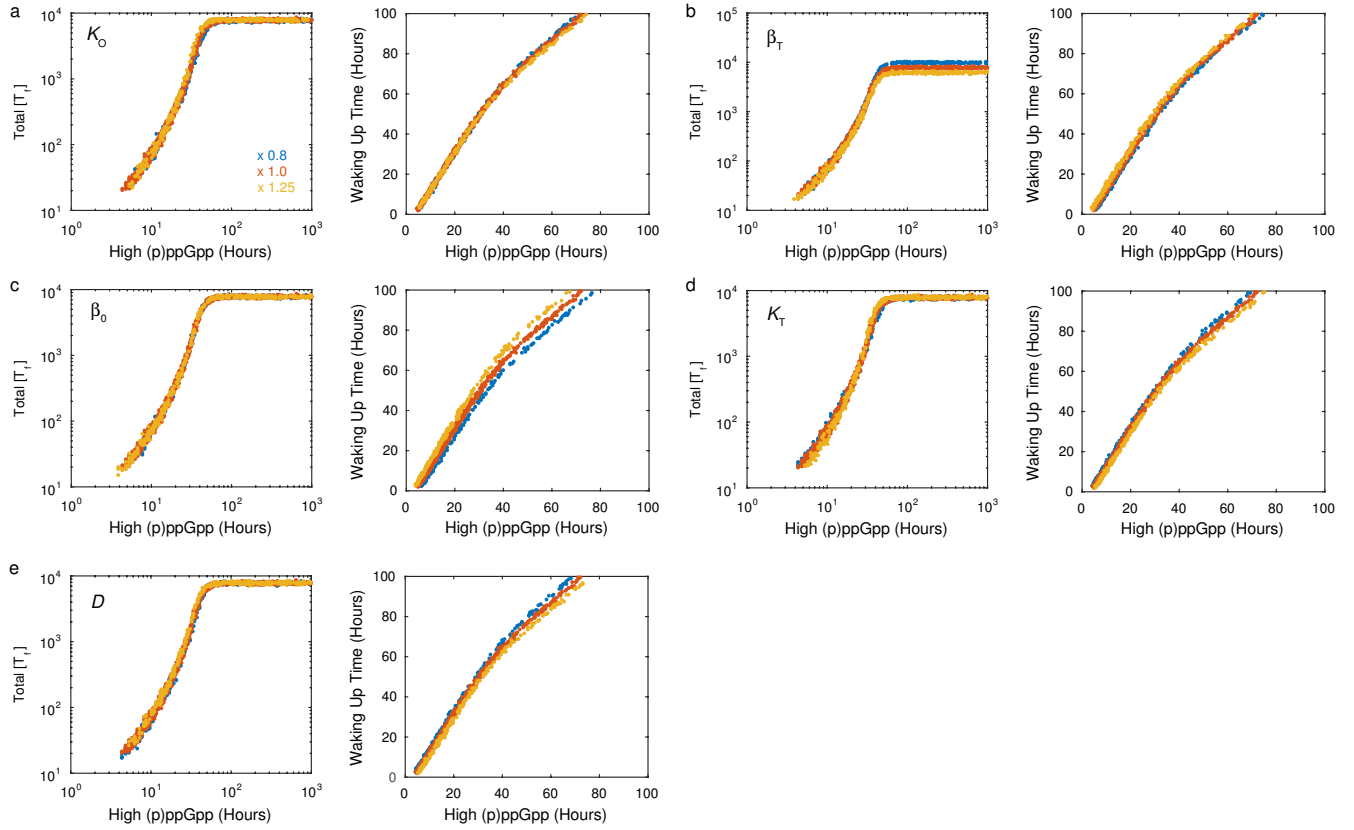

**Figure S7. Insensitive parameters of the model for coupled TA systems with (p)ppGpp fluctuation (related to Table S1).** We follow the same procedure as described in Fig. S6 caption. (a) Change in the dissociation constant between DNA and trimers  $A_2T$  ( $K_O$ ). (b) Change in the translation inhibition on toxins ( $\beta_T$ ). We keep the values of the ratios  $\beta_A/\beta_T$  and  $\beta_0/\beta_T$  and change the value of  $\beta_T$  accordingly. (c) Change in the translation inhibition on cellular growth ( $\beta_0$ ). (d) Change in the association constant between antitoxins and toxins ( $K_T$ ). (e) Change in the Michaelis-Menten constant for toxins' activity ( $D$ ).

# 3. Sequences of the plasmid constructs

pSEM3187

pMB1 origin

rop

lacI

zeocin<sup>R</sup>

rrnBT<sub>1,2</sub>

synthetic promoter with a lac operator

Ribosome binding site and relE ORF

Stop codon

Start codon

```
TAAATCAAAA GAATAGCCCG AGATAGGGTT GAGTGTGTT CCAGTTTGGA ACAAGAGTCC      60
ACTATTAAAG AACGTGGACT CCAACGTCAA AGGGCGAAAA ACCGTCTATC AGGGCGATGG      120
CCCCTACGT GAACCATCAC CCAAATCAAG TTTTTTGGGG TCGAGGTGCC GTAAAGCACT      180
AAATCGGAAC CCTAAAGGGA GCCCCGATT TAGAGCTTGA CGGGGAAAGC CGGCGAACGT      240
GGCGAGAAAG GAAGGGAAGA AAGCGAAAGG AGCGGGCGCT AGGGCGCTGG CAAGTGTAGC      300
GGTCACGCTG CGCGTAACCA CCACACCCGC CGCGCTTAAT GCGCCGCTAC AGGGCGCGTA      360
AAAGGATCTA GGTGAAGATC CTTTTTGATA ATCTCATGAC CAAAATCCCT TAACGTGAGT      420
TTTCGTTCCA CTGAGCGTCA GACCCCGTAG AAAAGATCAA AGGATCTTCT TGAGATCCTT      480
TTTTCTGCG CGTAATCTGC TGCTTGCAA CAAAAAACC ACCGCTACCA GCGGTGGTTT      540
GTTTGCCGGA TCAAGAGCTA CCAACTCTTT TTCCGAAGGT AACTGGCTTC AGCAGAGCGC      600
AGATACCAA TACTGTCCTT CTAGTGTAGC CGTAGTTAGG CCACCACTTC AAGAACTCTG      660
TAGCACCGCC TACATACCTC GCTCTGCTAA TCCTGTTACC AGTGGCTGCT GCCAGTGGCG      720
ATAAGTCGTG TCTTACCGGG TTGGACTCAA GACGATAGTT ACCGGATAAG GCGCAGCGGT      780
CGGGCTGAAC GGGGGTTCG TGCACACAGC CCAGCTTGGA GCGAACGACC TACACCGAAC      840
TGAGATACCT ACAGCGTGAG CTATGAGAAA GCGCCACGCT TCCCGAAGGG AGAAAGGCGG      900
ACAGGTATCC GGTAAGCGGC AGGGTCGGAA CAGGAGAGCG CACGAGGGAG CTTCCAGGGG      960
GAAACGCCTG GTATCTTTAT AGTCCTGTCT GGTTCGCCA CCTCTGACTT GAGCGTCGAT     1020
TTTTGTGATG CTCGTCAGGG GGGCGGAGCC TATGGAAA   CGCCAGCAAC GCGGCCTTTT     1080
TACGGTTCCT GGCCTTTTGC TGGCCTTTTG CTCACATGTT CTTTCCTGCG TTATCCCCTG     1140
```



|                                                                                     |      |
|-------------------------------------------------------------------------------------|------|
| ATTCTGTGGA TAACCGTATT ACCGCCTTTG AGTGAGCTGA TACCGCTCGC CGCAGCCGAA                   | 1200 |
| CGACCGAGCG CAGCGAGTCA GTGAGCGAGG AAGCTATGGT GCACTCTCAG TACAATCTGC                   | 1260 |
| TCTGATGCCG CATAGTTAAG CCAGTATAACA CTCCGCTATC GCTACGTGAC TGGGTCATGG                  | 1320 |
| CTGCGCCCCG ACACCCGCCA ACACCCGCTG ACGCGCCCTG ACGGGCTTGT CTGCTCCCCG                   | 1380 |
| CATCCGCTTA CAGACAAGCT GTGACCGTCT CCGGGAGCTG CATGTG <b>TCA</b> G AGGTTTTT <b>CAC</b> | 1440 |
| <b>CGTCATCACC GAAACGCGCG AGGCAGCTGC GGTAAAGCTC ATCAGCGTGG TCGTGCAGCG</b>            | 1500 |
| <b>ATTCACAGAT GTCTGCCTGT TCATCCGCGT CCAGCTCGTT GAGTTTCTCC AGAAGCGTTA</b>            | 1560 |
| <b>ATGTCTGGCT TCTGATAAAG CGGGCCATGT TAAGGGCGGT TTTTCTCTGT TTGGT<b>CAC</b>TG</b>     | 1620 |
| ATGCCTCCGT GTAAGGGGGA TTTCTGTTCA TGGGGGTAAT GATACCGATG AAACGAGAGA                   | 1680 |
| GGATGCTCAC GATACGGGTT ACTGATGATG AACATGCCCG GTTACTGGAA CGTTGTGAGG                   | 1740 |
| GTAAACAAC TGGCGGTATGG ATGCGGCGGG ACCAGAGAAA AATCACTCAG GGTCAATGCC                   | 1800 |
| AGCCGAACGC CAGCAAGACG TAGCCCAGCG CGTCGGCCGC CATGCCGGCG ATAATGGCCT                   | 1860 |
| GCTTCTCGCC GAAACGTTTGT GTGGCGGGAC CAGTGACGAA GGCTTGAGCG AGGGCGTGCA                  | 1920 |
| AGATTCCGAA TACCGCAAGC GACAGGCCGA TCATCGTCGC GCTCCAGCGA AAGCGGTCTT                   | 1980 |
| CGCCGAAAAT GACCCAGAGC GCTGCCGGCA CCTGTCCTAC GAGTTGCATG ATAAAGAAGA                   | 2040 |
| CAGTCATAAG TGCGGCGACG ATAGTCATGC CCCGCGCCCA CCGGAAGGAG CTGACTGGGT                   | 2100 |
| TGAAGGCTCT CAAGGGCATC GGTCGAGATC CC <b>GGTGCCTA ATGAGTGAGC TAACTTACAT</b>           | 2160 |
| <b>TAATTGCGTT GCGC<b>TCA</b>CTG CCCGCTTTCC AGTCGGGAAA CCTGTCGTGC CAGCTGCATT</b>     | 2220 |
| <b>AATGAATCGG CCAACGCGCG GGGAGAGGCG GTTTGCGTAT TGGGCGCCAG GGTGGTTTTT</b>            | 2280 |
| <b>CTTTTACCA GTGAGACGGG CAACAGCTGA TTGCCCTTCA CCGCCTGGCC CTGAGAGAGT</b>             | 2340 |
| <b>TGCAGCAAGC GGTCCACGCT GGTTTGCCCC AGCAGGCGAA AATCCTGTTT GATGGTGGTT</b>            | 2400 |
| <b>AACGGCGGGA TATAACATGA GCTGTCTTCG GTATCGTCGT ATCCCACTAC CGAGATATCC</b>            | 2460 |
| <b>GCACCAACGC GCAGCCCGGA CTCGGTAATG GCGCGCATTG CGCCCAGCGC CATCTGATCG</b>            | 2520 |
| <b>TTGGCAACCA GCATCGCAGT GGGAACGATG CCCTCATTCA GCATTTGCAT GGTTTGTTGA</b>            | 2580 |
| <b>AAACCGGACA TGGCACTCCA GTCGCCTTCC CGTTCGCTA TCGGCTGAAT TTGATTGCGA</b>             | 2640 |
| <b>GTGAGATATT TATGCCAGCC AGCCAGACGC AGACGCGCCG AGACAGAACT TAATGGGCCC</b>            | 2700 |
| <b>GCTAACAGCG CGATTTGCTG GTGACCCAAT GCGACCAGAT GCTCCACGCC CAGTCGCGTA</b>            | 2760 |
| <b>CCGTCTTCAT GGGAGAAAAT AATACTGTTG ATGGGTGTCT GGTCAGAGAC ATCAAGAAAT</b>            | 2820 |
| <b>AACGCCGGAA CATTAGTGCA GGCAGCTTCC ACAGCAATGG CATCCTGGTC ATCCAGCGGA</b>            | 2880 |

|                                                                                   |      |
|-----------------------------------------------------------------------------------|------|
| TAGTTAATGA TCAGCCCACT GACGCGTTGC GCGAGAAGAT TGTGCACCGC CGCTTTACAG                 | 2940 |
| GCTTCGACGC CGCTTCGTTT TACCATCGAC ACCACCACGC TGGCACCCAG TTGATCGGGC                 | 3000 |
| CGAGATTTAA TCGCCGCGAC AATTTGCGAC GGCGCGTGCA GGGCCAGACT GGAGGTGGCA                 | 3060 |
| ACGCCAATCA GCAACGACTG TTTGCCCGCC AGTTGTTGTG CCACGCGGTT GGAATGTAA                  | 3120 |
| TTCAGCTCCG CCATCGCCGC TTCCACTTTT TCCCGCGTTT TCGCAGAAAC GTGGCTGGCC                 | 3180 |
| TGGTTCACCA CGCGGGAAAC GGTCTGATAA GAGACACCGG CATACTCTGC GACATCGTAT                 | 3240 |
| AACGTTACTG GTTTCACATT CAC <b>CAC</b> CTG AATTGACTCT CTTCCGGGCG CTATCATGCC         | 3300 |
| ATACCGCGAA AGGTTTTGCG CCATTCGATG <b>GTGTC</b> CGGGA TCTCGACGCT CTCCCTTATG         | 3360 |
| CGACTCCTGC ATTAGGAAGC AGCCCAGTAG TAGGTTGAGG CCGTTGAGCA CCGCCGCCGC                 | 3420 |
| AAGGAATGGT GCATGCCGGC ATGCCGCCCT TTCGTCTTCA AGAATTAATT CCCAATTCCC                 | 3480 |
| CAGGCATCAA ATAAAACGAA AGGCTCAGTC GAAAGACTGG GCCTTTCGTT TTATCTGTTG                 | 3540 |
| TTTGTCGGTG AACGCTCTCC TGAGTAGGAC AAATCCGCCG GGAGCGGATT TGAACGTTGC                 | 3600 |
| GAAGCAACGG CCCGGAGGGT GCGGGCAGG ACGCCCGCCA TAAACTGCCA GGAATTAATT                  | 3660 |
| CCCCAGGCAT CAAATAAAAC GAAAGGCTCA GTCGAAAGAC TGGGCCTTTC GTTTTATCTG                 | 3720 |
| TTGTTTGTGCG GTGAACGCTC TCCTGAGTAG GACAAATCCG CCGGGAGCGG ATTTGAACGT                | 3780 |
| TGCGAAGCAA CGGCCCGGAG GGTGGCGGGC AGGACGCCCG CCATAAACTG CCAGGAATTA                 | 3840 |
| ATTCCCAGG CATCAAATAA AACGAAAGGC TCAGTCGAAA GACTGGGCCT TTCGTTTTAT                  | 3900 |
| CTGTTGTTTG TCGGTGAACG CTCTCCTGAG TAGGACAAAT CCGCCGGGAG CGGATTTGAA                 | 3960 |
| CGTTGCGAAG CAACGGCCCG GAGGGTGGCG GGCAGGACGC CCGCCATAAA CTGCCAGGAA                 | 4020 |
| TTAATTCCCC AGGCATCAA TAAAACGAAA GGCTCAGTCG AAAGACTGGG CCTTTCGTTT                  | 4080 |
| TATCTGTTGT TTGTCGGTGA ACGCTCTCCT GAGTAGGACA AATCCGCCGG GAGCGGATTT                 | 4140 |
| GAACGTTGCG AAGCAACGGC CCGGAGGGTG GCGGGCAGGA CGCCC GCCAT AACTGCCAG                 | 4200 |
| GAATTAATTC CCCAGGCATC AAATAAAACG AAAGGCTCAG TCGAAAGACT GGGCCTTTCG                 | 4260 |
| TTTTATCTGT TGTTTGTGCG TGAACGCTCT CCTGAGTAGG ACAAATCCGC CGGGAGCGGA                 | 4320 |
| TTTGAACGTT GCGAAGCAAC GGCCCGGAGG GTGGCGGGCA GGACGCCCGC CATAAACTGC                 | 4380 |
| CAGGAATTGG GGATCGGAAT TAATTCCCGG TTAAACCGG GGATCTCGAT CCCGCGAAAT                  | 4440 |
| TAATACGACT CACTATAGGG GAATTGTGAG CGGATAACAA TTCCCC <u>TCTA</u> <u>GAC</u> CTTCCCG | 4500 |
| TTTCGCTCAA GTTAGTATAA AAAAGCAGGC TTCAACGGAG CTCGTCGACC CGGGTACAAT                 | 4560 |
| TCTCAGTCCT GCTCCTCGGC CACGAAGTGC ACGCAGTTGC CGGCCGGGTC GCGCAGGGCG                 | 4620 |

|                                                                           |      |
|---------------------------------------------------------------------------|------|
| AACTCCCGCC CCCACGGCTG CTCGCCGATC TCGGTCATGG CCGGCCCGGA GGCGTCCCGG         | 4680 |
| AAGTTCGTGG ACACGACCTC CGACCACTCG GCGTACAGCT CGTCCAGGCC GCGCACCCAC         | 4740 |
| ACCCAGGCCA GGGTGTGTGC CGGCACCACC TGGTCCTGGA CCGCGCTGAT GAACAGGGTC         | 4800 |
| ACGTCTGCC GGACCACACC GGCGAAGTCG TCCTCCACGA AGTCCCGGA GAACCCGAGC           | 4860 |
| CGGTCCGTCC AGAACTCGAC CGCTCCGGCG ACGTCGCGCG CGGTGAGCAC CGGAACGGCA         | 4920 |
| CTGGTCAACT TGGCCATGGT TTAGTTCCTC ACCTTGTCGT ATTATACTAT GCCGATATAC         | 4980 |
| TATGCCGATG ATTAATTGTC AACACGTGCT CGAGTACCAA GCTTCTGTTT TGGCGGATGA         | 5040 |
| GAGAAGATTT TCAGCCTGAT ACAGATTAAA TCAGAACGCA GAAGCGGTCT GATAAACAG          | 5100 |
| AATTTGCCTG GCGGCAGTAG CGCGGTGGTC CCACCTGACC CCATGCCGAA CTCAGAAGTG         | 5160 |
| AAACGCCGTA GCGCCGATGG TAGTGTGGGG TCTCCCATG CGAGAGTAGG GAACTGCCAG          | 5220 |
| GCATCAAATA AAACGAAAGG CTCAGTCGAA AGACTGGGCC TTTCGTTTTA TCTGTTGTTT         | 5280 |
| GTCGGTGAAC GCTCTCCTGA GTAGGACAAA TCCGCCGGA GCGGATTTGA ACGTTGCGAA          | 5340 |
| GCAACGGCCC GGAGGGTGGC GGGCAGGACG CCCGCCATAA ACTGCCAGGC ATCAAATTAA         | 5400 |
| GCAGAAGGCC ATCCTGACGG ATGGCCTTTT TCGTTTT <b>GAA TTCTCACTCA TTAGGCACCC</b> | 5460 |
| <b>CAGGCTTTAC ACTTTATGCT TCCGGCTCGT ATAATGTGTG GAATTGTGAG CGCTCACAAT</b>  | 5520 |
| <b>TTCTGCAGAG CAGGCCCTTA TGGCGTATTT TCTGGATTTT GACGAGCGGG CACTAAAGGA</b>  | 5580 |
| ATGGCGAAAG CTGGGCTCGA CGGTACGTGA ACAGTTGAAA AAGAAGCTGG TTGAAGTACT         | 5640 |
| TGAGTCACCC CGGATTGAAG CAAACAAGCT CCGTGGTATG CCTGATTGTT ACAAGATTAA         | 5700 |
| GCTCCGGTCT TCAGGCTATC GCCTTGATA CCAGTTATA GACGAGAAAG TTGTCGTTTT           | 5760 |
| CGTGATTTCT GTTGGGAAAA GAGAACGCTC GGAAGTATAT AGCGAGGCGG TCAAACGCAT         | 5820 |
| <b>TCTCTGATAA GGATCCGCCT</b> ACCTTTCACG AGTTGCGCAG TTTGTCTGCA AGACTCTATG  | 5880 |
| AGAAGCAGAT AAGCGATAAG TTTGCTCAAC ATCTTCTCGG GCATAAGTCG GACACCATGG         | 5940 |
| CATCACAGTA TCGTGATGAC AGAGGCAGGG AGTGGGACAA AATTGAAATC AAATAATGAT         | 6000 |
| TTTATTTTGA CTGATAGTGA CCTGTTCGTT GCAACAAATT GATAAGCAAT GCTTTTTTAT         | 6060 |
| AATGCCAACT TAGTATAAAA AAGCTGAACG AGAAACGTAA AATGATATAA ATATCAATAT         | 6120 |
| ATTAAATTAG ATTTTGCATA AAAACAGAC TACATAATAC TGTA AACAC AACATATGCA          | 6180 |
| GTCACTATGA ATCAACTACT TAGATGGTAT TAGTGACCTG TAACAGAGCA TTAGCGCAAA         | 6240 |
| GCTTGGCACT GGCCGTCGTT TTACAACGTC GTGACTGGGA AAACCCTGGC GTTACCCAAC         | 6300 |
| TTAATCGCCT TGCAGCACAT CCCCCTTTCG CCAG                                     | 6334 |

//

Sequence of the mCherry-YFP fragment in pSEM4063

mCherry

venusYFP

start codon

stop codon

```
GGTACCAAAA AGATCCTGAC ATTTGTAATT ACAAGAGGTG TAAGACATGG TGAGCAAGGG 60
CGAGGAGGAT AACATGGCCA TCATCAAGGA GTTCATGCGC TTCAAGGTGC ACATGGAGGG 120
CTCCGTGAAC GGCCACGAGT TCGAGATCGA GGGCGAGGGC GAGGGCCGCC CCTACGAGGG 180
CACCCAGACC GCCAAGCTGA AGGTGACCAA GGGTGGCCCC CTGCCCTTCG CCTGGGACAT 240
CCTGTCCCCT CAGTTCATGT ACGGCTCCAA GGCCTACGTG AAGCACCCCG CCGACATCCC 300
CGACTACTTG AAGCTGTCCT TCCCCGAGGG CTTCAAGTGG GAGCGCGTGA TGAACTTCGA 360
GGACGGCGGC GTGGTGACCG TGACCCAGGA CTCCTCCCTG CAGGACGGCG AGTTCATCTA 420
CAAGGTGAAG CTGCGCGGCA CCAACTTCCC CTCCGACGGC CCCGTAATGC AGAAGAAGAC 480
CATGGGCTGG GAGGCCTCCT CCGAGCGGAT GTACCCGAG GACGGCGCCC TGAAGGGCGA 540
GATCAAGCAG AGGCTGAAGC TGAAGGACGG CGGCCACTAC GACGCTGAGG TCAAGACCAC 600
CTACAAGGCC AAGAAGCCCG TGCAGCTGCC CGGCGCCTAC AATGTCAACA TCAAGTTGGA 660
CATCACCTCC CACAACGAGG ACTACACCAT CGTGGAACAG TACGAACGCG CCGAGGGCCG 720
CCACTCCACC GGCGGCATGG ACGAGCTGTA CAAC TCTAGA CCAGTACGTG TGACGCTGGA 780
TGAACTCTGA TGGTCTCGAG CAGCGGCATG GTTAGTAAAG GAGAAGAACT TTTCACTGGA 840
GTTGTCCCAA TTTTAGTTGA ACTAGATGGC GACGTGAACG GTCATAAGTT CAGTGTCTCC 900
GGCGAAGGTG AGGGTGATGC AACGTACGGT AAGTTAACTT TGAAGTTAAT ATGTACAACC 960
GGCAAGCTGC CTGTTCCCTG GCCTACCCTG GTGACAACGT TAGGTTATGG GTTGATGTGC 1020
TTTGCTAGAT ACCCAGATCA CATGAAAAGG CATGACTTCT TTAAATCTGC AATGCCAGAA 1080
GGTTACGTCC AAGAACGTAC TATTTCTTT AAAGATGACG GTAATTATAA AACTAGGGCT 1140
GAAGTTAAAT TCGAAGGTGA CACACTTGTA AATCGAATAG AGTTAAAGGG GATTGATTTT 1200
AAAGAGGATG GTAATATTCT AGGCCATAAA CTTGAATATA ACTATAATTC ACACAACGTT 1260
TACATTACCG CCGACAAGCA GAAGAATGGA ATCAAAGCCA ATTTTAAGAT TAGACACAAT 1320
ATTGAGGATG GTGGAGTACA GCTTGCTGAT CATTACCAAC AAAATACCCG GATCGGTGAT 1380
GGACCAGTTT TGCTACCCGA TAACCATTAT CTGTCTATC AAAGCAAATT GTCAAAAAGAT 1440
CCTAACGAAA AAAGAGACCA CATGGTACTC TTGGAATTTG TAACAGCTGC TGGGATTACA 1500
CATGGCATGG ATGAACTATA CAAAGGTTCT GGAACCGCAT AATAAGTCGA C 1551
```

//

Sequence of the mCherry-YFP fragment in pSEM4049

mCherry

venusYFP

start codon

stop codon

```
GGTACCAAAA AGATCTTGAC ATTTGTAATT ACAAGAGGTG TAAGACATGG TGAGCAAGGG 60
CGAGGAGGAT AACATGGCCA TCATCAAGGA GTTCATGCGC TTCAAGGTGC ACATGGAGGG 120
```

|             |                       |             |                    |            |            |      |
|-------------|-----------------------|-------------|--------------------|------------|------------|------|
| CTCCGTGAAC  | GGCCACGAGT            | TCGAGATCGA  | GGGCGAGGGC         | GAGGGCCGCC | CCTACGAGGG | 180  |
| CACCCAGACC  | GCCAAGCTGA            | AGGTGACCAA  | GGGTGGCCCC         | CTGCCCTTCG | CCTGGGACAT | 240  |
| CCTGTCCCCT  | CAGTTCATGT            | ACGGCTCCAA  | GGCCTACGTG         | AAGCACCCCG | CCGACATCCC | 300  |
| CGACTACTTG  | AAGCTGTCCT            | TCCCCGAGGG  | CTTCAAGTGG         | GAGCGCGTGA | TGAACTTCGA | 360  |
| GGACGGCGGC  | GTGGTGACCG            | TGACCCAGGA  | CTCCTCCCTG         | CAGGACGGCG | AGTTCATCTA | 420  |
| CAAGGTGAAG  | CTGCGCGGCA            | CCAACTTCCC  | CTCCGACGGC         | CCCGTAATGC | AGAAGAAGAC | 480  |
| CATGGGCTGG  | GAGGCCTCCT            | CCGAGCGGAT  | GTACCCCGAG         | GACGGCGCCC | TGAAGGGCGA | 540  |
| GATCAAGCAG  | AGGCTGAAGC            | TGAAGGACGG  | CGGCCACTAC         | GACGCTGAGG | TCAAGACCAC | 600  |
| CTACAAGGCC  | AAGAAGCCCC            | TGCAGCTGCC  | CGGCGCCTAC         | AATGTCAACA | TCAAGTTGGA | 660  |
| CATCACCTCC  | CACAACGAGG            | ACTACACCAT  | CGTGGAACAG         | TACGAACGCG | CCGAGGGCCG | 720  |
| CCACTCCACC  | GGCGGCATGG            | ACGAGCTGTA  | CAAG <b>TCTAGA</b> | AGCGTCTCGA | GCAGCGGCAT | 780  |
| GGTTAGTAAA  | GGAGAAGAAC            | TTTTCACTGG  | AGTTGTCCCA         | ATTTTAGTTG | AACTAGATGG | 840  |
| CGACGTGAAC  | GGTCATAAGT            | TCAGTGTCTC  | CGGCGAAGGT         | GAGGGTGATG | CAACGTACGG | 900  |
| TAAGTTAACT  | TTGAAGTTAA            | TATGTACAAC  | CGGCAAGCTG         | CCTGTTCCCT | GGCCTACCCT | 960  |
| GGTGACAACG  | TTAGGTTATG            | GGTTGATGTG  | CTTTGCTAGA         | TACCCAGATC | ACATGAAAAG | 1020 |
| GCATGACTTC  | TTTAAATCTG            | CAATGCCAGA  | AGGTTACGTC         | CAAGAACGTA | CTATTTTCTT | 1080 |
| TAAAGATGAC  | GGTAATTATA            | AAACTAGGGC  | TGAAGTTAAA         | TTCGAAGGTG | ACACACTTGT | 1140 |
| AAATCGAATA  | GAGTTAAAGG            | GGATTGATTT  | CAAAGAGGAT         | GGTAATATTC | TAGGCCATAA | 1200 |
| ACTTGAATAT  | AACTATAATT            | CACACAACGT  | TTACATTACC         | GCCGACAAGC | AGAAGAATGG | 1260 |
| AATCAAAGCC  | AATTTTAAGA            | TTAGACACAA  | TATTGAGGAT         | GGTGGAGTAC | AGCTTGCTGA | 1320 |
| TCATTACCAA  | CAAAATACCC            | CGATCGGTGA  | TGGACCAGTT         | TTGCTACCCG | ATAACCATTA | 1380 |
| TCTGTCCCTAT | CAAAGCAAAT            | TGTCAAAAAGA | TCCTAACGAA         | AAAAGAGACC | ACATGGTACT | 1440 |
| CTTGGAATTT  | GTAACAGCTG            | CTGGGATTAC  | ACATGGCATG         | GATGAACTAT | ACAAAGGTTC | 1500 |
| TGGAACCGCA  | <b>TAA</b> TAAGTCG AC |             |                    |            |            | 1522 |

//
